# Supplementary material for: Facile synthesis of Fe-doped CoP nanosheet arrays wrapped by graphene for overall water splitting
Source: Royal Society of Chemistry journal article supplement (doi:10.1039/d1dt02183d), 2021-01-01
Supplement: d1dt02183d1.pdf [file d1dt02183d1.pdf]

## Supporting Information

### Facile synthesis of Fe-doped CoP nanosheet arrays wrapped by graphene for overall water splitting

Zeinab Tahmasebi, Akbar Mohammadi Zardkhoshoui, and Saied Saeed Hosseiny Davarani\*

Department of Chemistry, Shahid Beheshti University, G. C., 1983963113, Evin, Tehran, Iran.

Corresponding author: \*Tel: +98 21 22431661; Fax: +98 21 22431661; E-mail: [ss-hosseiny@sbu.ac.ir](mailto:ss-hosseiny@sbu.ac.ir) (S.S.H. Davarani).

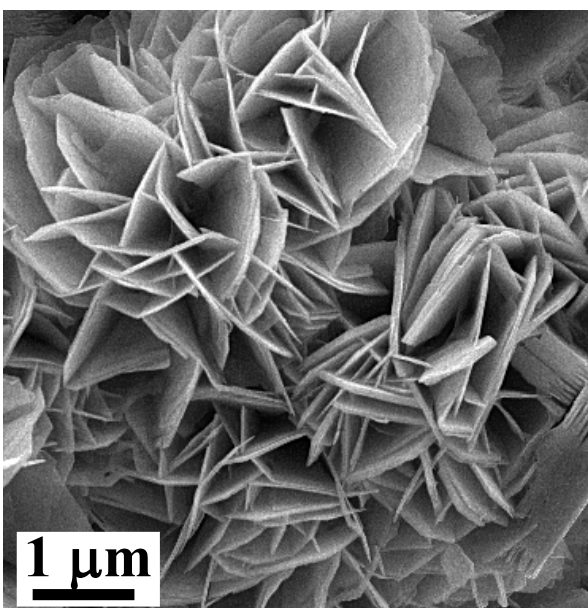

**Fig. S1** FE-SEM image of the precursor.

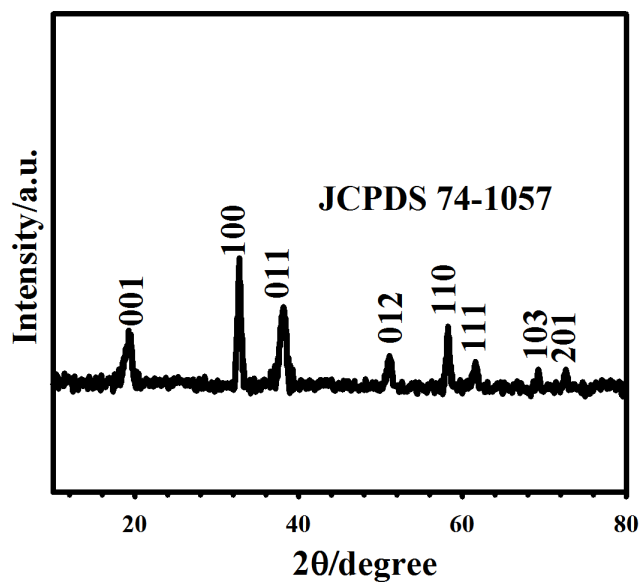

**Fig. S2** XRD pattern of the FCOH sample.

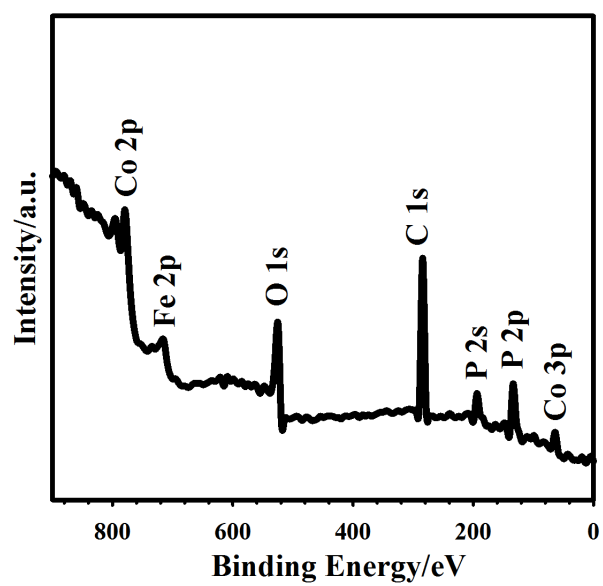

**Fig. S3** Survey spectrum of the  $F_{0.25}CP-G$  sample.

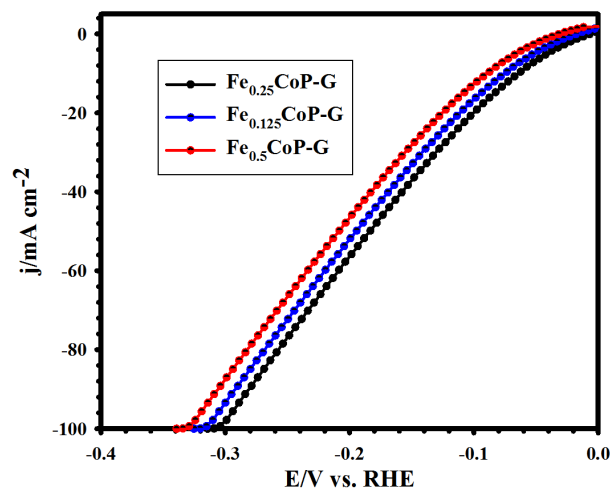

**Fig. S4** HER polarization plots of the  $\text{Fe}_{0.125}\text{CP-G}$ ,  $\text{Fe}_{0.25}\text{CP-G}$ , and  $\text{Fe}_{0.5}\text{CP-G}$  in KOH.

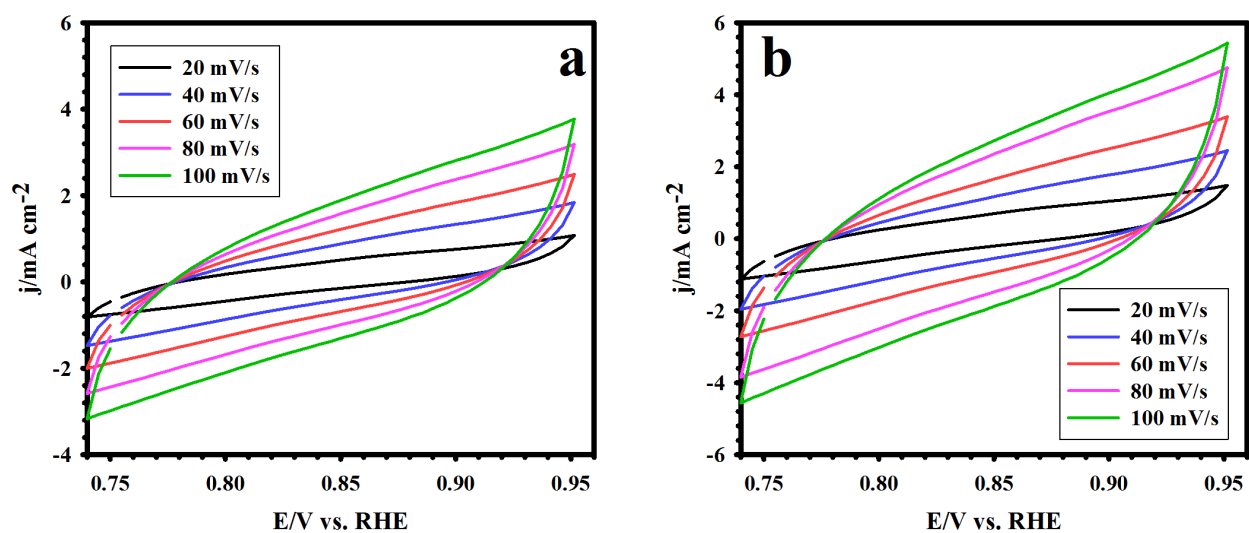

**Fig. S5** (a) CV curves of the  $\text{Fe}_{0.25}\text{CP}$  at various scan rates. (b) CV curves of the  $\text{Fe}_{0.25}\text{CP-G}$  at various scan rates.

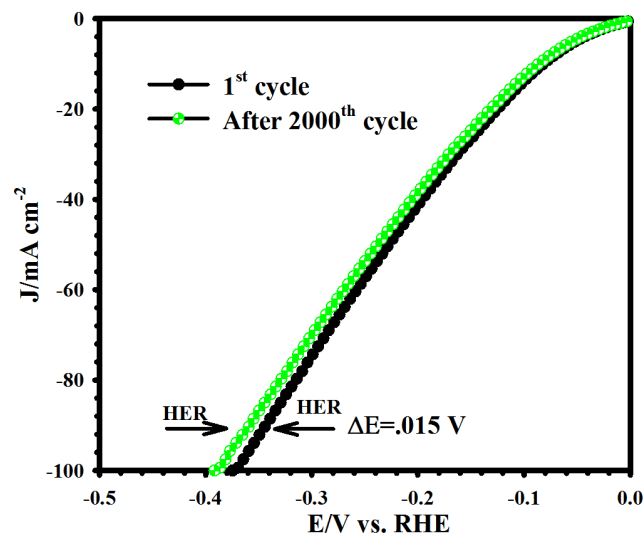

**Fig. S6** Polarization curves for the  $F_{0.25}CP$  before and after 2000th CV cycles for HER in 1 M KOH.

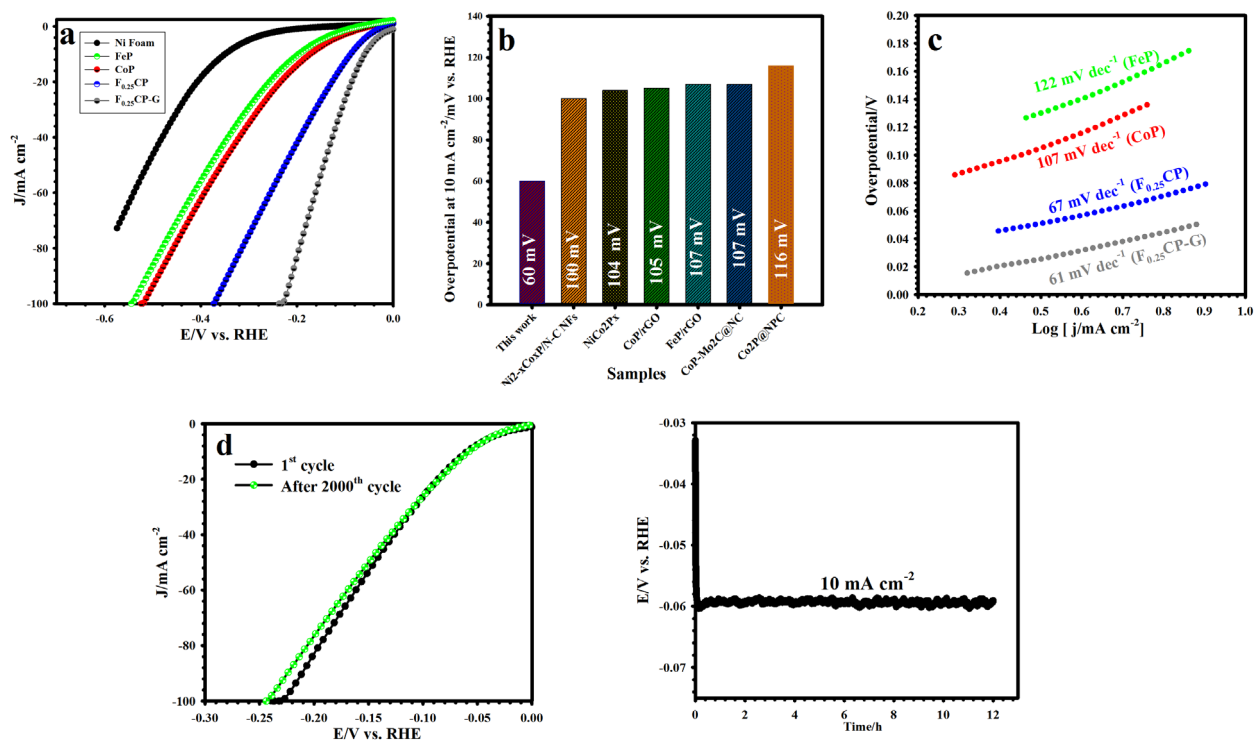

**Fig. S7** (a) HER polarization plots of the FeP, CoP,  $F_{0.25}CP$ ,  $F_{0.25}CP-G$ , and bare Ni foam in 0.5 M  $H_2SO_4$  electrolyte. (b) Comparison of  $\eta$  at  $10 \text{ mA cm}^{-2}$  between  $F_{0.25}CP-G$  and previous reports in acidic medium. (c) Related Tafel slopes for FeP, CoP,  $F_{0.25}CP$ , and  $F_{0.25}CP-G$ . (d) The polarization curves for the  $F_{0.25}CP-G$  before and after 2000th CV cycles in 0.5 M  $H_2SO_4$ . (e) chronopotentiometric measurement of the  $F_{0.25}CP-G$  toward HER at  $10 \text{ mA cm}^{-2}$  for 12 h in 0.5 M  $H_2SO_4$ .

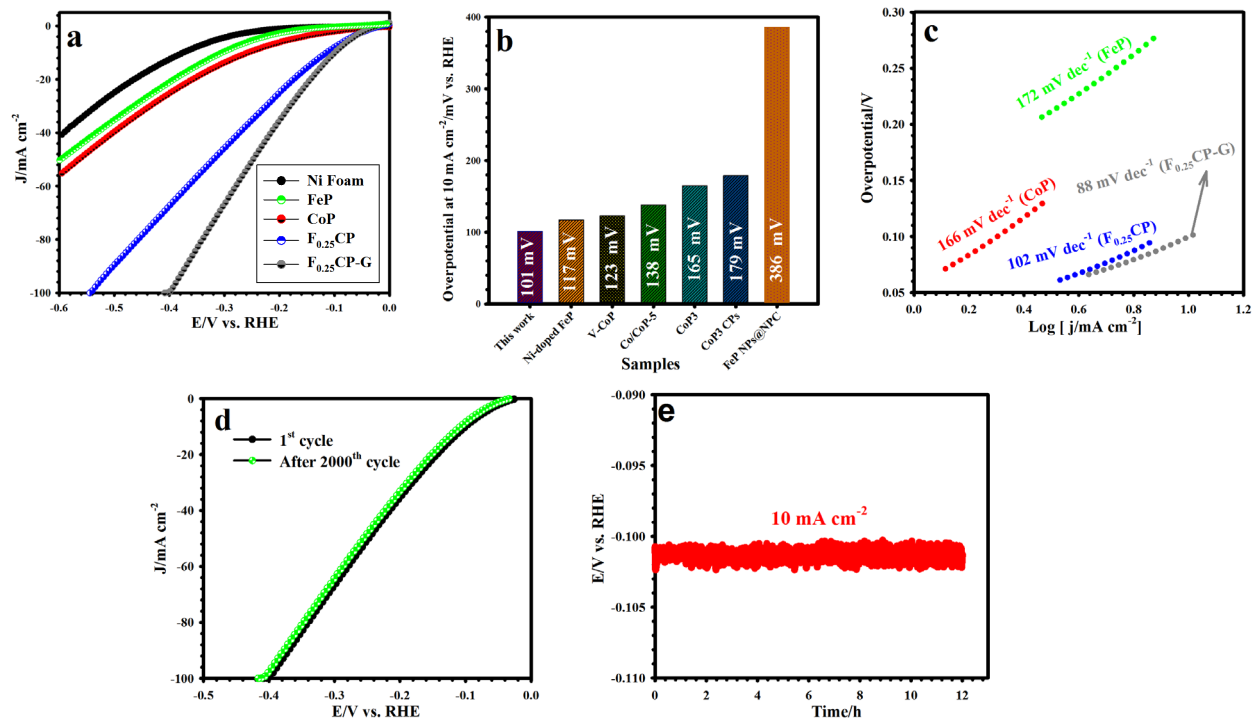

**Fig. S8** (a) HER polarization plots of the FeP, CoP,  $F_{0.25}\text{CP}$ ,  $F_{0.25}\text{CP-G}$ , and bare Ni foam in 1 M PBS electrolyte. (b) Comparison of  $\eta$  at  $10 \text{ mA cm}^{-2}$  between  $F_{0.25}\text{CP-G}$  and previous reports in 1 M PBS. (c) Related Tafel slopes for FeP, CoP,  $F_{0.25}\text{CP}$ , and  $F_{0.25}\text{CP-G}$ . (d) The polarization curves for the  $F_{0.25}\text{CP-G}$  before and after 2000th CV cycles in 1 M PBS. (e) chronopotentiometric measurement of the  $F_{0.25}\text{CP-G}$  toward HER at  $10 \text{ mA cm}^{-2}$  for 12 h in 1 M PBS.

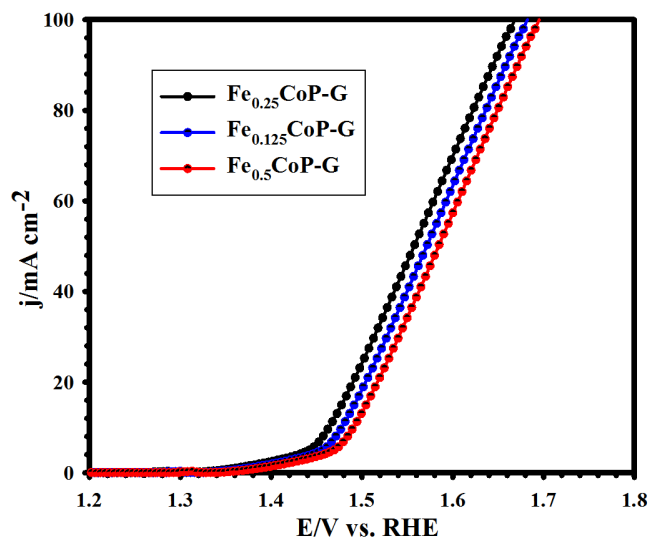

**Fig. S9** OER polarization plots of the  $F_{0.125}\text{CP-G}$ ,  $F_{0.25}\text{CP-G}$ , and  $F_{0.5}\text{CP-G}$  in KOH.

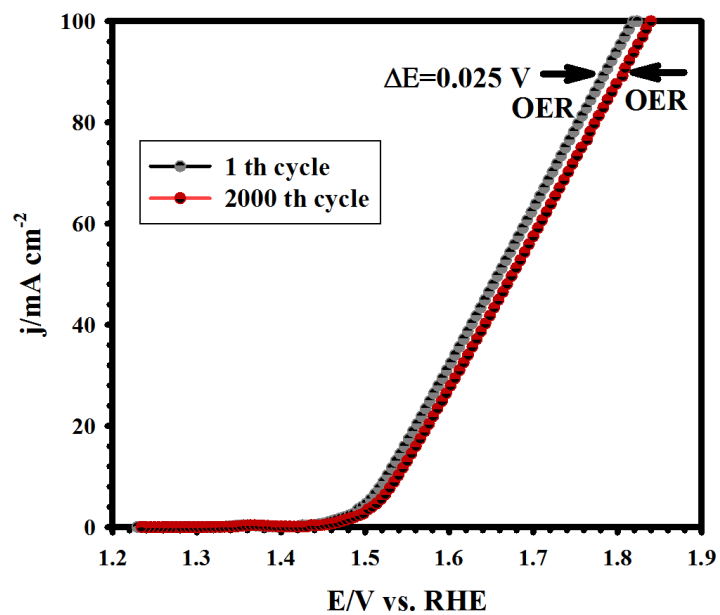

**Fig. S10** Polarization curves for the  $F_{0.25}CP$  before and after 2000th CV cycles for OER in 1 M KOH.

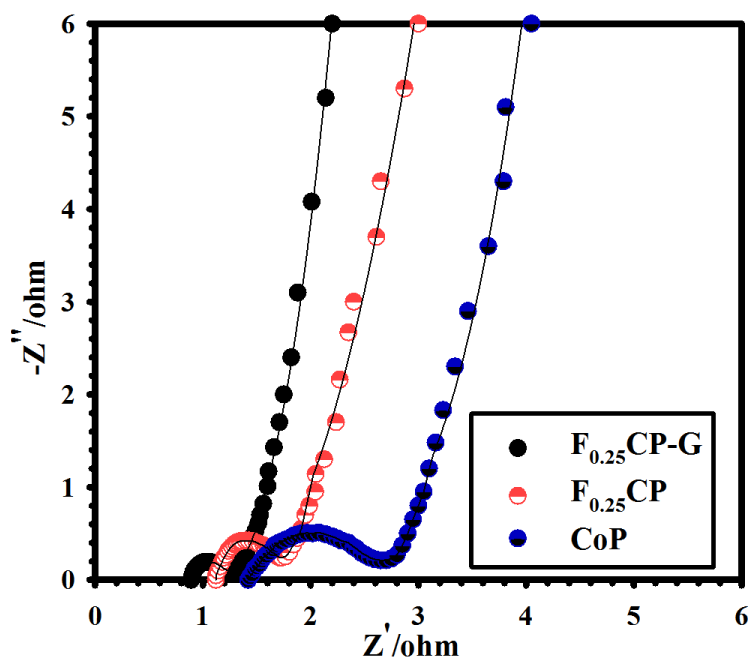

**Fig. S11** EIS measurements of the CoP,  $F_{0.25}CP$ , and  $F_{0.25}CP-G$  electrodes.
